# Supplementary material for: Mechanism and thermal effects of phytic acid-assisted porous carbon sheets for high-performance lithium–sulfur batteries
Source: Royal Society of Chemistry journal article supplement (doi:10.1039/d3qi01926h), 2023-01-01
Supplement: d3qi01926h1.pdf [file d3qi01926h1.pdf]

## Supporting Information

### **Mechanism and Thermal Effects of Phytic Acid-Assisted Porous Carbon Sheets for High-Performance Lithium-Sulfur Batteries**

*Riguang Cheng<sup>a</sup>, Jiayi Liu<sup>a</sup>, Pantrangi Manasa<sup>b</sup>, Mi Zhou<sup>c</sup>, Yanxun Guan<sup>a</sup>, Kexiang Zhang<sup>a</sup>, Xiangcheng Lin<sup>a</sup>, Federico Rosei<sup>d</sup>, Aleskey A. Pimerzin<sup>e</sup>, Hans Jürgen Seifert<sup>f</sup>, Fen Xu<sup>a,\*</sup>, Lixian Sun<sup>a,\*</sup>, Dan Cai<sup>a,\*</sup>, Julan Zeng<sup>g</sup>, Zhong Cao<sup>g</sup>, Hongge Pan<sup>h</sup>*

<sup>a</sup> School of Material Science & Engineering, Guangxi Key Laboratory of Information Materials and Guangxi Collaborative Innovation Center of Structure and Property for New Energy and Materials, Guilin University of Electronic Technology, Guilin 541004, PR China.

<sup>b</sup> State Key Laboratory of Advanced Processing and Recycling of Non-ferrous Metals, School of Material Science and Engineering, Lanzhou University of Technology, Lanzhou 730050, P. R. China.

<sup>c</sup> Huaneng Beijing Co-Generation Co., Ltd. Beijing, 100000, PR China.

<sup>d</sup> Centre Énergie, Matériaux et Télécommunications, Institut National de la Recherche Scientifique, 1650 Boul. Lionel Boulet, Varennes, Québec, J3X1P7 Canada.

<sup>e</sup> Chemical Department, Samara State Technical University, Samara, 443100 Russia.

<sup>f</sup> Institute for Applied Materials, Karlsruhe Institute of Technology, Hermann von Helmholtz Platz 1, 76344 Eggenstein Leopoldshafen, Germany.

<sup>g</sup>, Hunan Provincial Key Laboratory of Materials Protection for Electric Power and Transportation, Changsha University of Science & Technology, Changsha 410114,

PR China.

<sup>h</sup> School of New Energy Science and Technology, Xi'an Technological University.

\*Corresponding author

Prof. Dr. L. X. Sun

541004 (China) Fax: 86-773-2303763

*E-mail address: [sunlx@guet.edu.cn](mailto:sunlx@guet.edu.cn)*

Prof. Dr. F. Xu

*E-mail address: [xufen@guet.edu.cn](mailto:xufen@guet.edu.cn)*

Dr. D. Cai

*E-mail address: [dancai1985@guet.edu.cn](mailto:dancai1985@guet.edu.cn)*

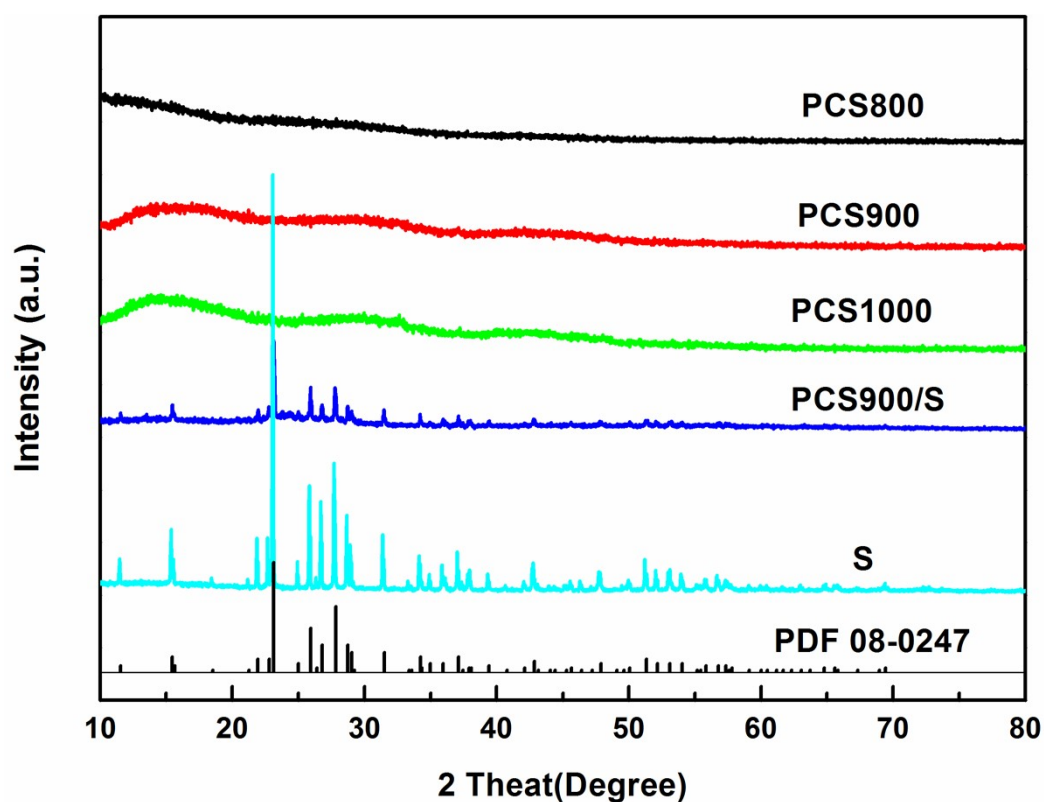

**Figure S1.** XRD patterns of PCS800, PCS900, PCS1000, PCS900/S and sulfur samples.

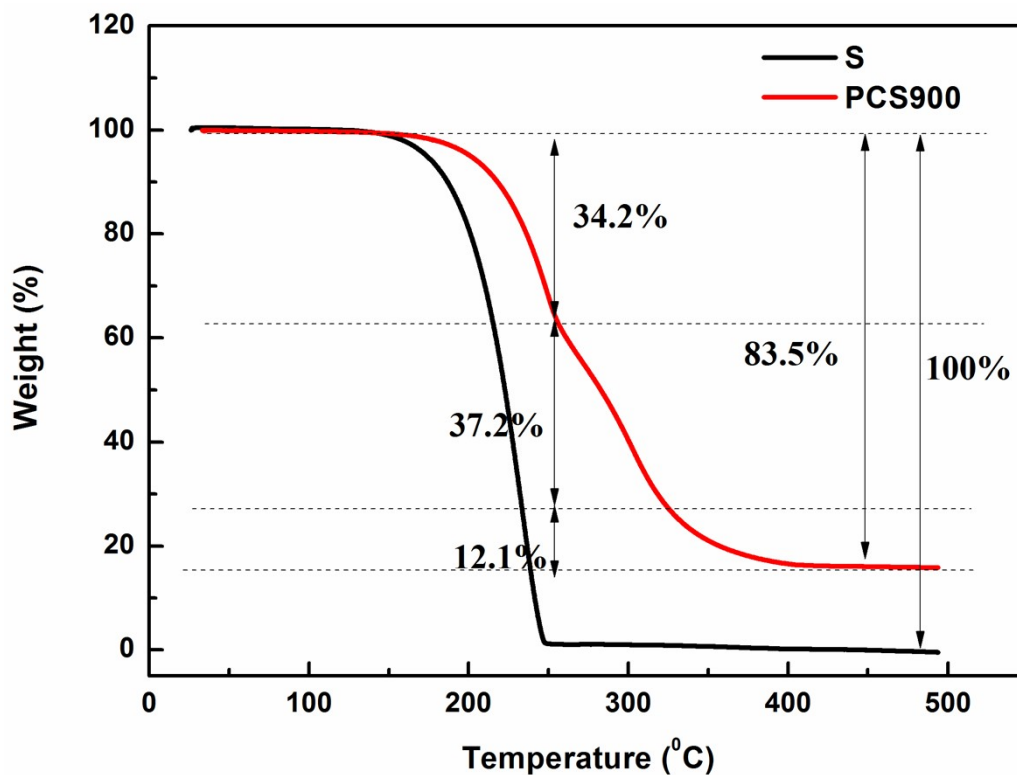

Figure S2. TGA analysis of PCS900/S.

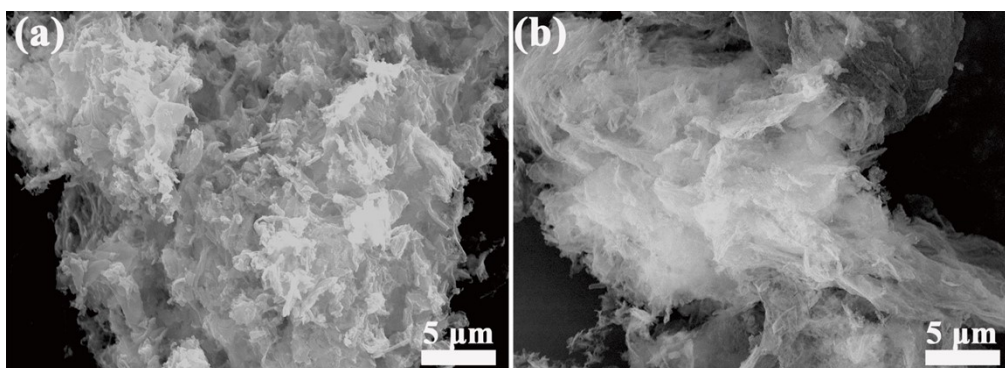

Figure S3. The morphology of PCSs obtained with melamine to phytic acid ratios: (a) 4:2, and (b) 4:6.

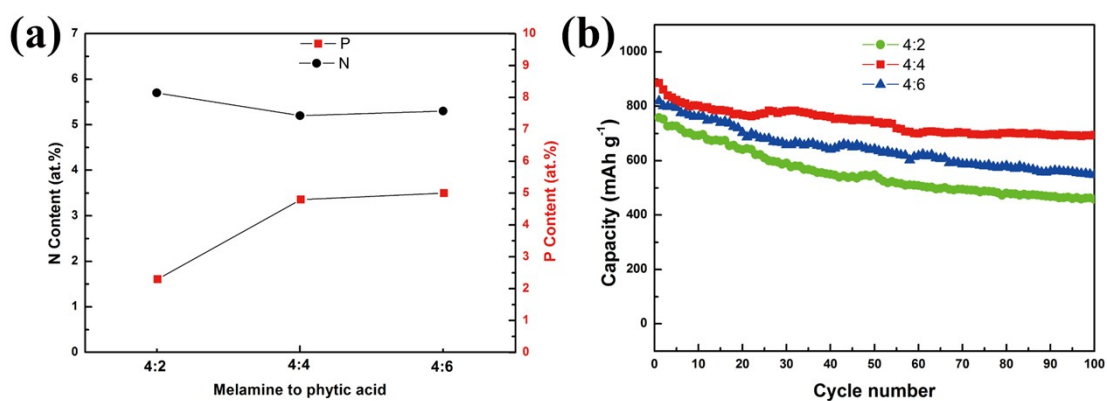

Figure S4. The P and O contents (b) of PCSs (a), and the cycling performance of

different melamine to phytic acid ratios: 4:2, 4:4 and (b) 4:6

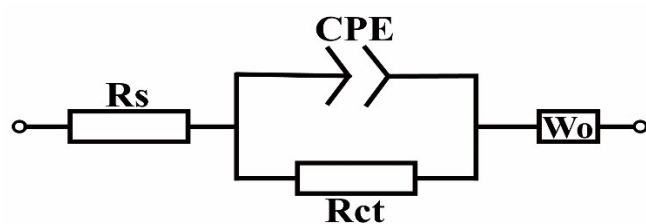

**Figure S5.** The equivalent circuit models of PCS800/S, PCS900/S, and PCS1000/S cathodes.

**Table S1.** Equivalent circuit fitting results of PCS800/S, PCS900/S, and PCS1000/S cathodes.

| Sample    | $R_s(\Omega)$ | $R_{ct}(\Omega)$ |
|-----------|---------------|------------------|
| PCS800/S  | 12.4          | 250.2            |
| PCS900/S  | 4.1           | 16.4             |
| PCS1000/S | 4.1           | 21.5             |

**Table S2.** Comparison of performance with based on carbon sheets of Li–S batteries in this work

| Samples                                            | Sulfur content (wt%) | Sulfur loading (mg cm <sup>-2</sup> ) | Rate (C)                             | Cycle number                           | Retained capacity (mA h g <sup>-1</sup> ) | Average capacity decay rates (%/cycle)     | High-loading performance       |                          |                                 | Ref.             |
|----------------------------------------------------|----------------------|---------------------------------------|--------------------------------------|----------------------------------------|-------------------------------------------|--------------------------------------------|--------------------------------|--------------------------|---------------------------------|------------------|
|                                                    |                      |                                       |                                      |                                        |                                           |                                            | Loading (mg cm <sup>-2</sup> ) | Cycle No.                | Capacity (mAh g <sup>-1</sup> ) |                  |
| shaddock peel carbon sheets                        | 70                   | 1.2                                   | 0.1<br>1                             | 100<br>100                             | 779<br>476                                | 0.34<br>0.28                               | -                              | -                        | -                               | [1]              |
| Amino-functionalized rGO                           | 60                   | -                                     | 0.5                                  | 350                                    | 650                                       | 0.06                                       | -                              | -                        | -                               | [2]              |
| Graphite oxides                                    | 66                   | -                                     | 0.1                                  | 50                                     | 954                                       | 0.092                                      | -                              | -                        | -                               | [3]              |
| Sulfur Intercalation of Graphene oxide             | 32                   | 1                                     | 0.06                                 | 220                                    | 880                                       | 0.033                                      | -                              | -                        | -                               | [4]              |
| Microporous carbon nanosheets                      | 70                   | 0.7-1.0                               | 0.5                                  | 500                                    | 612                                       | 0.08                                       | 2.5                            | 30                       | 900                             | [5]              |
| Corncoobs-derived carbon sheets                    | 44                   | -                                     | 0.03                                 | 50                                     | 634                                       | 1.2                                        | -                              | -                        | -                               | [6]              |
| Graphene-Backboned Mesoporous Carbon Nanosheets    | 64                   | 0.4-0.6                               | 1                                    | 400                                    | 510                                       | 0.054                                      | -                              | -                        | -                               | [7]              |
| Corn stalk-derived carbon sheet                    | 52                   | 1                                     | 0.2                                  | 100                                    | 743                                       | 0.23                                       | -                              | -                        | -                               | [8]              |
| exfoliated graphene sheets                         | 70                   | 0.56                                  | 0.06<br>3                            | 60<br>200                              | 899<br>290                                | 0.14<br>0.10                               | -                              | -                        | -                               | [9]              |
| Carbon aerogel/graphene/S                          | 59                   | 1.2                                   | 0.1<br>1                             | 100<br>500                             | 471<br>341                                | 0.69<br>0.18                               | -                              | -                        | -                               | [10]             |
| N-doped hierarchical porous carbon                 | 70                   | 1.5                                   | 0.5<br>1                             | 100<br>300                             | 759<br>577                                | 0.12<br>0.11                               | 7.1                            | 50                       | 700                             | [11]             |
| N-porous carbon                                    | 50                   | 1                                     | 0.1<br>0.5                           | 250<br>100                             | 452<br>400                                | 0.23<br>0.34                               | -                              | -                        | -                               | [12]             |
| N-Doped Hierarchical Porous Carbon–Carbon Nanotube | 63                   | 1.5                                   | 1                                    | 600                                    | 407                                       | 0.066                                      | -                              | -                        | -                               | [13]             |
| Nitrogen-Enriched Mesoporous Carbons               | 60                   | -                                     | 1                                    | 100                                    | 620                                       | 0.31                                       | -                              | -                        | -                               | [14]             |
| <b>Phytic Acid -derived porous carbon sheets</b>   | <b>83</b>            | <b>1.5</b>                            | <b>0.1</b><br><b>0.5</b><br><b>1</b> | <b>200</b><br><b>200</b><br><b>500</b> | <b>724</b><br><b>651</b><br><b>446</b>    | <b>0.19</b><br><b>0.16</b><br><b>0.079</b> | <b>2.5</b><br><b>4.2</b>       | <b>100</b><br><b>100</b> | <b>671</b><br><b>508</b>        | <b>This work</b> |

## References

- [1] S. Lu, Y. Chen, J. Zhou, Z. Wang, X. Wu, J. Gu, X. Zhang, A. Pang, Z. Jiao, L. Jiang, A Sheet-like Carbon Matrix Hosted Sulfur as Cathode for High-performance Lithium-Sulfur Batteries, *Sci. Rep.*, 2016, **6**, 20445.
- [2] Z. Wang, Y. Dong, H. Li, Z. Zhao, H. Wu, C. Hao, S. Liu, J. Qiu, X. Lou, Enhancing Lithium–Sulphur Battery Performance by Strongly Binding the Discharge Products on Amino-Functionalized Reduced Graphene Oxide, *Nat. Commun.*, 2014, **5**, 5002.
- [3] L. Ji, M. Rao, H. Zheng, L. Zhang, Y. Li, W. Duan, J. Guo, E.J. Cairns, Y. Zhang, Graphene Oxide as a Sulfur Immobilizer in High Performance Lithium/Sulfur Cells, *J. Am. Chem. Soc.*, 2011, **133**, 18522.
- [4] S. Zheng, Y. Wen, Y. Zhu, Z. Han, J. Wang, J. Yang, C. Wang, In Situ Sulfur Reduction and Intercalation of Graphite Oxides for Li-S Battery Cathodes, *Adv. Energy Mater.*, 2014, **4**, 1400482.
- [5] B. He, W.C. Li, C. Yang, S.Q. Wang, A.H. Lu, Incorporating Sulfur Inside the Pores of Carbons for Advanced Lithium-Sulfur Batteries: An Electrolysis Approach, *ACS Nano*, 2016, **10**, 1633.
- [6] J. Guo, J. Zhang, F. Jiang, S. Zhao, Q. Su, G. Du, Microporous Carbon Nanosheets Derived from Corncoobs for Lithium–Sulfur Batteries, *Electrochim. Acta*, 2015, **176**, 853.
- [7] Y. Dong, S. Liu, Z. Wang, Y. Liu, Z. Zhao, J. Qiu, Sulfur-Infiltrated Graphene-Backboned Mesoporous Carbon Nanosheets with Conductive Polymer Coating for Long-life Lithium-Sulfur Batteries, *Nanoscale*, 2015, **7**, 7569.
- [8] G. Yuan, F. Yin, Y. Zhao, Z. Bakenov, G. Wang, Y. Zhang, Corn Stalk-Derived Activated Carbon with a Stacking Sheet-Like Structure as Sulfur Cathode Supporter for Lithium/Sulfur Batteries, *Ionics*, 2015, **22**, 63.
- [9] L. Zhang, H. Huang, H. Yin, Y. Xia, J. Luo, C. Liang, Y. Gan, X. Tao, W. Zhang, Sulfur Synchronously Electrodeposited onto Exfoliated Graphene Sheets as a Cathode Material for Advanced Lithium–Sulfur Batteries, *J. Mater. Chem. A*, 2015, **3**, 16513.
- [10] Y. Yan, M. Shi, Y. Zou, Y. Wei, L. Chen, C. Fan, R. Yang, Y. Xu, Tunable Hierarchical Porous Carbon Aerogel/Graphene Composites Cathode Matrix for Li-S Batteries, *J. Alloys Compd.*, 2019, **791**, 952.
- [11] S. Wang, X. Liu, K. Zou, Y. Deng, G. Chen, Toward a Practical Li-S Battery Enabled by Synergistic Confinement of a Nitrogen-Enriched Porous Carbon as a Multifunctional Interlayer and Sulfur-Host Material, *J. Electroanal. Chem.*, 2019, **858**, 113797.
- [12] Q. Zhang, L. Wu, W. Jiang, S. Tang, N-Doped Carbon Material Derived from Riboflavin as Host of Sulfur for Enhanced Lithium-Sulfur Battery, *Chemistryselect*, 2020, **5**, 2654.
- [13] J.J. Cai, C. Wu, S.R. Yang, Y. Zhu, P.K. Shen, K.L. Zhang, Templated and Catalytic Fabrication of N-Doped Hierarchical Porous Carbon–Carbon Nanotube Hybrids as Host for Lithium–Sulfur Batteries, *ACS Appl. Mater.*

*Interfaces*, 2017, **9**, 33876.

- [14] F. Sun, J. Wang, H. Chen, W. Li, W. Qiao, D. Long, L. Ling, High Efficiency Immobilization of Sulfur on Nitrogen-Enriched Mesoporous Carbons for Li-S Batteries, *ACS Appl. Mater. Interfaces*, 2013, **5**, 5630.
